# Supplementary material for: Dysphagia in patients with isolated pontine infarction
Source: PubMed Central journal article supplement — Neural Regen Res. 2018 Dec;13(12):2156–9. doi: 10.4103/1673-5374.241466 (PMC6199935; doi:10.4103/1673-5374.241466), 2018-12
Supplement: NRR-13-2156_Suppl1.pdf [file NRR-13-2156_Suppl1.pdf]

**Open peer review report 1**

**Reviewer:** Heng-Li Tian, Shanghai Sixth People's Hospital, Shanghai Jiaotong University, China.

**Comments to the authors:**

The authors examined the incidence and provide predictive factors for the development of dysphagia in patients with isolated pontine infarction. Dysphagia was observed in 50(34.2%) at 1 day and 24(16.4%) at discharge of the 146 patients, respectively. Univariate analysis showed that more severe neurological deficit as measured by NIHSS and mRS score as well as bilateral pontine infarction were associated with dysphagia after pontine infarction. This paper is useful in understanding dysphagia following pontine infarction and could be accepted for publication in NRR after revision. I have specific comments as shown below.

1. The results of univariate analysis need further validation by using multivariate analysis.
2. The pontine infarction range and location should be studied in detail.
3. Long-time follow-up are not available.
4. The severity of dysphagia should be graded.
